# Supplementary material for: Successful utilization of the EMR in a multiple sclerosis clinic to support quality improvement and research initiatives at the point of care
Source: PubMed Central journal article supplement — Mult Scler J Exp Transl Clin. 2018 Nov 30;4(4):2055217318813736. doi: 10.1177/2055217318813736 (PMC6293369; doi:10.1177/2055217318813736), 2018-11-30
Supplement: Supplemental_Material.pdf [file Supplemental_Material.pdf]

## Supplemental File 1

### Selected Screenshots of the Multiple Sclerosis Structured Clinical Documentation Support Toolkit within the Electronic Medical Record

© 2018 EPIC Systems Cooperation. Used with permission.

# Symptoms tracking

**▼ Symptoms Tracking**

**▼ Visual Symptoms?**

**▼ Visual Loss**  
Timeline      
Which eye?     
Progression?      
Additional details?

**▼ Diplopia**  
Timeline

**▼ Eye Pain**  
Timeline

**▼ Dizziness/Vertigo?**

**▼ Facial Symptoms?**

**▼ Dysarthria?**

**▼ Limb Symptoms?**

**▼ Limb Pain**  
Timeline      
Location?      
Progression?      
Additional details?

**▼ Limb Paresthasias**  
Timeline

**▼ Limb Weakness**  
Timeline

**▼ Tremors/Involuntary Movements**  
Timeline

**▼ Spasticity**  
Timeline

**▼ Sensory Level?**

**▼ Lhermitte Phenomenon?**

**▼ Lhermitte Phenomenon**  
Timeline      
Progression?     
Additional details?

**▼ Autonomic Symptoms?**

**▼ Gait Disorder?**

**▼ Gait Disorder**  
Timeline      
Gait aids?        
Progression?     
Additional details?

**▼ Falls?**

**▼ Falls**  
Falls in the past year?    
Number of falls in the past year?   
Additional details?

**▼ Memory Complaints?**

**▼ Fatigue?**

**▼ Fatigue**  
Timeline      
Progression?     
Additional details?

**▼ Uhthoff's Phenomenon?**

**▼ Uhthoff's Phenomenon**  
Timeline      
Progression?     
Additional details?

**▼ Other Symptoms?**

# Prior or current DMT

**Prior Medical Treatment (Not Currently Taking)**

Disease modifying therapy
  None
  Avonex
  Rebif
  Betaseron
  Extavia
  Copaxone
  Gilenya
  Tysabri
  Lemtrada
  Mitoxantr...
  Plegridy
  Aubagio
  Tecfidera ...
  Zinbryta
  Glatopa
  Ocrevus
  Other

**Rebif**

Duration
  < 3 months
  3 - 12 months
  > 1 year

Discontinuation Reason
  Lack of Efficacy
  Adverse Effects
  Safety
  Other

Lack of Efficacy
  Clinical relapse
  MRI relapse
  Progression

© 2018 EPIC Systems Cooperation. Used with permission.

# Imaging

**MRI BRAIN**

Is there MRI Brain information to report at this visit?
  Yes
  No
  N/A

Performed Date:
  Don't know
  2025
  2024
  2023
  2022
  2021
  2020
  2019
  2018
  2017
  2016
  2015
  2014
  2013
  2012
  2011
  2010
  2009
  2008
  2007
  2006
  2005
  2004
  2003
  2002
  2001
  2000
  1999
  1998
  1997
  1996
  1995
  1994
  1993
  1992
  1991
  1990
  1989
  1988
  1987
  1986
  1985
  1984
  1983
  1982
  1981
  1980
  1979
  1978
  1977
  1976
  1975
  Prior to 1975

Source
  Reports Only
  Images

With or Without Contrast?
  With
  Without

T1 Lesions/Black Holes:
  None (0)
  Mild (1-9)
  Moderate (10-20)
  Severe (>20/Conf...)
  Not Determined

Number of T2 Lesions:
  None (0)
  Mild (1-9)
  Moderate (10-20)
  Severe (>20/Conf...)
  Not Determined

GAD enhancing lesions?
  Yes
  No

<> How many GAD enhancing lesions?
  Don't know
  0
  1
  2
  3
  4
  5
  6
  7
  8
  9
  10+

Brainstem Involvement?
  Yes
  No

Cerebral Atrophy?
  Yes
  No
  Not Determined

Progression
  Stable
  Improved
  Worsening
  N/A

**MRI CERVICAL SPINE**

Is there MRI Cervical Spine information to report at this visit?
  Yes
  No
  N/A

**MRI THORACIC SPINE**

Is there MRI Thoracic Spine information to report at this visit?
  Yes
  No
  N/A

**EVOKED POTENTIALS**

Is there Evoked Potentials information to report at this visit?
  Yes
  No
  N/A

© 2018 EPIC Systems Cooperation. Used with permission.

# Synopsis in the EDSS

| NoteWriter       |              |                    |                                      |
|------------------|--------------|--------------------|--------------------------------------|
| ROS              | General Exam | Neuro Exam (EDSS)  | Impression <a href="#">Edit Note</a> |
| Visual/Brainstem | Pyramidal    | Cerebellar/Sensory | Bowel/Cerebral/Ambulation            |
| <b>SYNOPSIS</b>  |              |                    |                                      |
| 1. Visual        | 2            | Ambulation Score   | 0                                    |
| 2. Brainstem     | 0            |                    |                                      |
| 3. Pyramidal     | 1            |                    |                                      |
| 4. Cerebellar    | 0            | EDSS Step          | 2                                    |
| 5. Sensory       | 1            |                    |                                      |
| 6. Bowel/Bladder | 0            |                    |                                      |
| 7. Cerebral      | 0            |                    |                                      |

© 2018 EPIC Systems Cooperation. Used with permission.

# Impression

**NoteWriter**

# Capture of information into progress note

| 3 PYRAMIDAL FUNCTIONS  |                      |                  |        |                      |                  | © 2018 Epic Systems Corporation. Used with permission. |                      |      |                     |                      |      |  |
|------------------------|----------------------|------------------|--------|----------------------|------------------|--------------------------------------------------------|----------------------|------|---------------------|----------------------|------|--|
| Set all to normal/none |                      | Clear all        |        | RIGHT                |                  |                                                        | LEFT                 |      |                     | BOTH                 |      |  |
| Biceps                 | absent               | diminished       |        | absent               | diminished       |                                                        | absent               |      | absent              |                      |      |  |
|                        | <b>normal</b>        | exaggerated      |        | <b>normal</b>        | exaggerated      |                                                        | normal               |      | normal              |                      |      |  |
|                        | nonsustained clonus  | sustained clonus |        | nonsustained clonus  | sustained clonus |                                                        | nonsustained clonus  |      | nonsustained clonus |                      |      |  |
| Triceps                | absent               | diminished       |        | absent               | diminished       |                                                        | absent               |      | absent              |                      |      |  |
|                        | normal               | exaggerated      |        | <b>normal</b>        | exaggerated      |                                                        | normal               |      | normal              |                      |      |  |
|                        | nonsustained clonus  | sustained clonus |        | nonsustained clonus  | sustained clonus |                                                        | nonsustained clonus  |      | nonsustained clonus |                      |      |  |
| Brachioradialis        | absent               | diminished       |        | absent               | diminished       |                                                        | absent               |      | absent              |                      |      |  |
|                        | <b>normal</b>        | exaggerated      |        | <b>normal</b>        | exaggerated      |                                                        | normal               |      | normal              |                      |      |  |
|                        | nonsustained clonus  | sustained clonus |        | nonsustained clonus  | sustained clonus |                                                        | nonsustained clonus  |      | nonsustained clonus |                      |      |  |
| Knee                   | absent               | diminished       |        | absent               | diminished       |                                                        | absent               |      | absent              |                      |      |  |
|                        | <b>normal</b>        | exaggerated      |        | <b>normal</b>        | exaggerated      |                                                        | normal               |      | normal              |                      |      |  |
|                        | nonsustained clonus  | sustained clonus |        | nonsustained clonus  | sustained clonus |                                                        | nonsustained clonus  |      | nonsustained clonus |                      |      |  |
| Ankle                  | absent               | diminished       |        | absent               | diminished       |                                                        | absent               |      | absent              |                      |      |  |
|                        | <b>normal</b>        | exaggerated      |        | <b>normal</b>        | exaggerated      |                                                        | normal               |      | normal              |                      |      |  |
|                        | nonsustained clonus  | sustained clonus |        | nonsustained clonus  | sustained clonus |                                                        | nonsustained clonus  |      | nonsustained clonus |                      |      |  |
| Plantar response       | flexor               |                  |        | flexor               |                  |                                                        | flexor               |      |                     | flexor               |      |  |
|                        | neutral or equivocal |                  |        | neutral or equivocal |                  |                                                        | neutral or equivocal |      |                     | neutral or equivocal |      |  |
|                        | extensor             |                  |        | extensor             |                  |                                                        | extensor             |      |                     | extensor             |      |  |
| Cutaneous reflexes     | <b>normal</b>        | weak             | absent | <b>normal</b>        | weak             | absent                                                 | <b>normal</b>        | weak | absent              | <b>normal</b>        | weak |  |
|                        | * Palmomental reflex |                  |        | absent               |                  |                                                        | absent               |      |                     | absent               |      |  |
|                        |                      |                  |        | present              |                  |                                                        | present              |      |                     | present              |      |  |

**My Note** Progress Notes

ROS | General Exam | **Neuro Exam (EDSS)** | Impression Tag | Share w/ Patient

11 | B | ? | + | Insert SmartText | ↵ | ↶ | ↷ | ↺ | ↻ | 📄 | 👤

|                                  |  |      |  |                                |  |
|----------------------------------|--|------|--|--------------------------------|--|
| <b>CRANIAL NERVE EXAM</b>        |  |      |  | Hearing Loss                   |  |
| Extraocular movements impairment |  | none |  | Dysarthria                     |  |
| Nystagmus                        |  | none |  | Dysphagia                      |  |
| Trigeminal Damage                |  | none |  | Other cranial nerve functions  |  |
| Facial Weakness                  |  | none |  | <b>FUNCTIONAL SYSTEM SCORE</b> |  |

  

### 3. Pyramidal Functions

| REFLEXES               | Right  | Left         | Both        |                                                   |      |
|------------------------|--------|--------------|-------------|---------------------------------------------------|------|
| Biceps                 | normal | normal       |             | Knee extensors                                    | 5    |
| Triceps                | absent | normal       |             | Plantar flexion                                   | 5    |
| Brachioradialis        | normal | normal       |             | Dorsiflexion                                      | 5    |
| Knee                   | normal | normal       |             | *Position test UE, pronation                      |      |
| Ankle                  | normal | normal       |             | *Position test UE, downward drift                 |      |
| Plantar response       | flexor | flexor       |             | *Position test LE, sinking                        |      |
| Cutaneous reflexes     | normal | normal       |             | *Able to lift only one leg at a time (grade in *) |      |
| *Palmomental reflex    |        |              |             | *Walking on heels                                 |      |
| <b>LIMB STRENGTH</b>   |        | <b>Right</b> | <b>Left</b> | *Walking on toes                                  |      |
| Deltoid                |        | 5            | 5           | *Hopping on one foot                              | 5    |
| Biceps                 |        | 5            | 5           | <b>SPASTICITY</b>                                 |      |
| Triceps                |        | 5            | 5           | Arms                                              | none |
| Wrist/finger Extensors |        | 5            | 5           | Legs                                              | none |
| Wrist/finger flexors   |        | 5            | 5           | Gait                                              | none |
| Hip flexors            |        | 5            | 5           | <b>OVERALL MOTOR PERFORMANCE</b>                  |      |
| Knee flexors           |        | 5            | 5           | <b>FUNCTIONAL SYSTEM SCORE</b>                    |      |

© 2018 Epic Systems Corporation. Used with permission.
